# Supplementary material for: Effects of Haptic Information on the Perception of Dynamic 3-D Movement
Source: PLoS One. 2014 Sep 2;9(9):e106633. doi: 10.1371/journal.pone.0106633 (PMC4152328; doi:10.1371/journal.pone.0106633)
Supplement: Table S2 — Obtained points of subjective equality (PSE) for every participant. (XLSX) [file pone.0106633.s002.xlsx]

## Sheet: Table S2
Table S2
Obtained points of subjective equality (PSE) for every participant
	Experiment 1					Experiment 2					Experiment 3
		Conditions					Conditions					Conditions
	Subject No.	Push-back	Pull-away	No-move		Subject No.	Push-back	Pull-away	No-move		Subject No.	Push-back	Pull-away	No-move
	s1	3.2	7.2	0.8		s1	2.4	6.4	0.8		s1	4	5.6	0.8
	s2	4.8	6.4	8.8		s2	4	7.2	6.4		s2	0	2.4	3.2
	s3	-7.2	-0.8	-8		s3	-4.8	2.4	-4.8		s3	-4	-1.6	-1.6
	s4	0	2.4	-1.6		s4	0	0	-1.6		s4	-1.6	-0.8	0
	s5	1.6	8	2.4		s5	0.8	8.8	0		s5	0	1.6	0.8
	s6	0	4	-0.8		s6	0.8	2.4	2.4		s6	1.6	1.6	2.4
	s7	0.8	4	0.8		s7	0.8	4	2.4		s7	0	3.2	-0.8
	Mean	0.46	4.46	0.34		Mean	0.57	4.46	0.8		Mean	0	1.71	0.69
